# Supplementary material
Source: publisher figshare collection journal article supplement (https://acs.figshare.com/ndownloader/files/13254089)
Supplement: Supplementary file 1 [file 13254089]

# Supporting Information

## Direct Observation of Perovskite Photodetector Performance Enhancement by Atomically-Thin Interface Engineering

*Zibo Li,<sup>†</sup> Jieni Li,<sup>†</sup> Dong Ding,<sup>†</sup> Huizhen Yao,<sup>†</sup> Lai Liu,<sup>†</sup> Xue Gong,<sup>†</sup> Bingbing Tian,<sup>†</sup>*

*Henan Li,<sup>‡</sup> Chenliang Su,<sup>†,§</sup> Yumeng Shi<sup>\*†,§</sup>*

<sup>†</sup> SZU-NUS Collaborative Innovation Center for Optoelectronic Science&Technology,  
International Collaborative Laboratory of 2D Materials for Optoelectronics Science  
and Technology of Ministry of Education, College of Optoelectronic Engineering,  
Shenzhen University, Shenzhen 518060, China.

<sup>‡</sup> College of Electronic Science and Technology, Shenzhen University, Shenzhen  
518060, China.

<sup>§</sup> Engineering Technology Research Center for 2D Material Information Function  
Devices and Systems of Guangdong Province, College of Optoelectronic Engineering,  
Shenzhen University, Shenzhen 518060, China.

Corresponding author:

Yumeng Shi, E-mail: [yumeng.shi@szu.edu.cn](mailto:yumeng.shi@szu.edu.cn)

**Note S1. Definition of Richardson constant**

The Richardson constant ( $A^*$ ) is expressed as follows:  $\square$

$$A^* = \frac{4\pi q m k_B^2}{h^3}$$

where  $k_B$  denotes the Boltzmann constant,  $q$  the electronic charge,  $m$  the electron mass, and  $h$  the Planck constant.<sup>1,2</sup>

**Note S2. Estimation of effective contact area ( $A_e$ )**

In our C-AFM experimental setup the nanoscale contacts are formed between the conductive tip and sample. We used the Hertz contact theory to estimate the effective contact area.<sup>3,4</sup> The tip is assumed to be an elastic sphere and the underlying sample surface is assumed to be flat to describe the contact formed between the tip and  $WS_2$  nanosheets, as schematically illustrated in Figure S7a. Figure S7b shows the deformation image of  $WS_2$ /MAPbI<sub>3</sub> heterojunction, which can be used to extract the insert depth of tip. Figure S7c shows the AFM topographic image of RS-15M, which is very sharp to estimate tip's radius ( $r$ ) at the insert depth. At last, the effective contact area was calculated as:

$$A_e = \pi r^2$$

$\sim 9.63 \text{ nm}^2$  for  $WS_2$ /MAPbI<sub>3</sub> and  $6.54 \text{ nm}^2$  for MAPbI<sub>3</sub>.

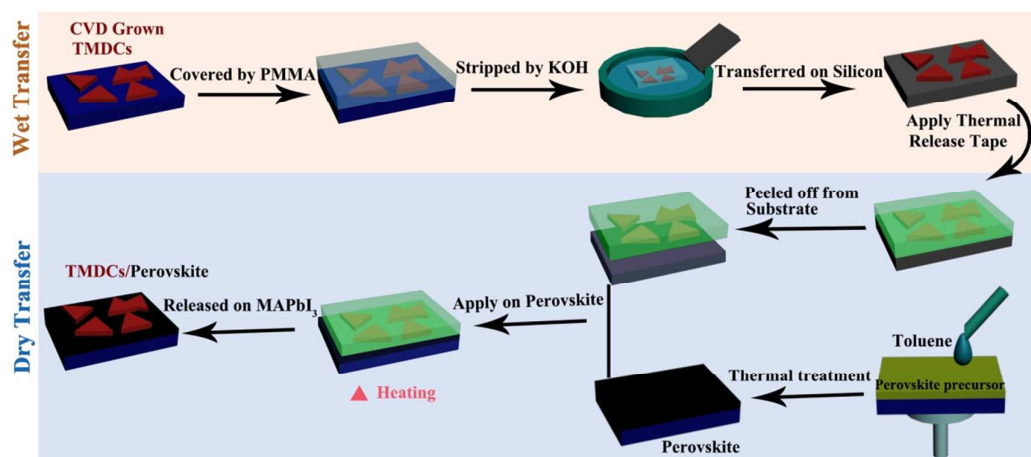

**Figure S1.** Schematic illustration of the fabrication process of WS<sub>2</sub>/MAPbI<sub>3</sub> heterostructure.

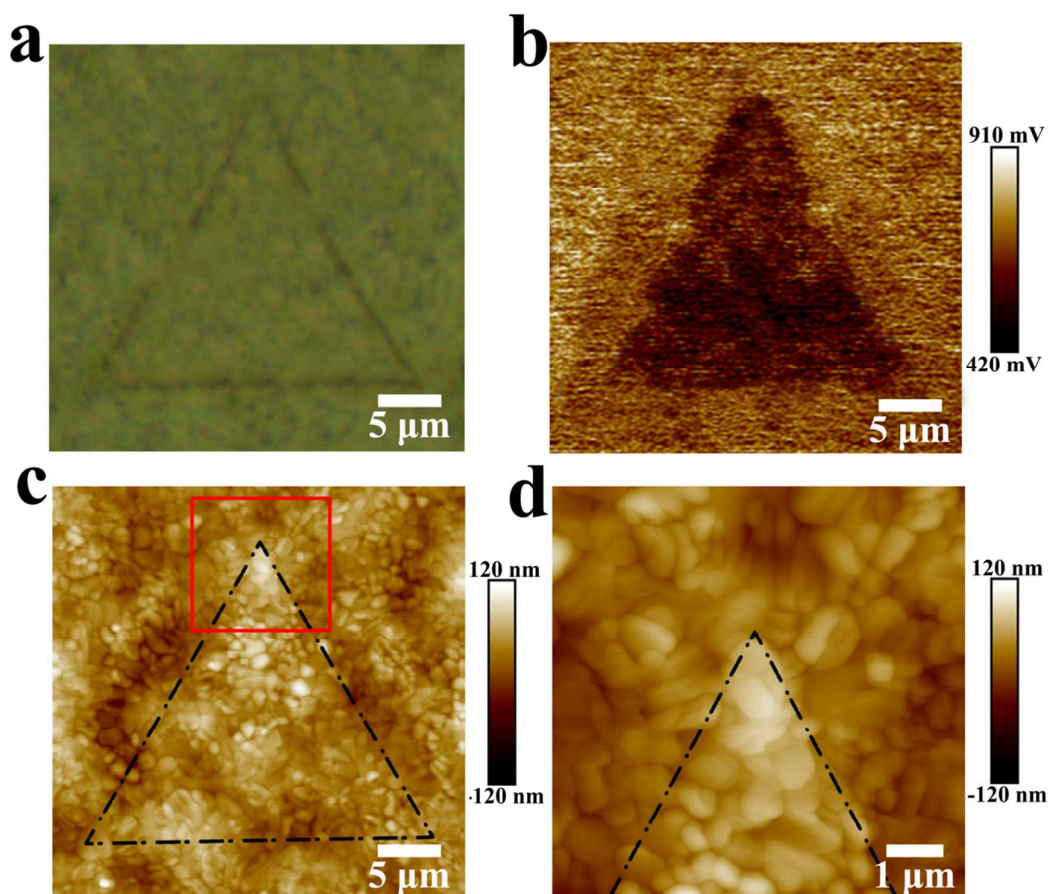

**Figure S2.** (a) Optical microscope image. (b) Surface potential image of WS<sub>2</sub>/MAPbI<sub>3</sub> heterostructure. (c) AFM topographic image. (d) The zoom-in topographic image of the red frame in (c).

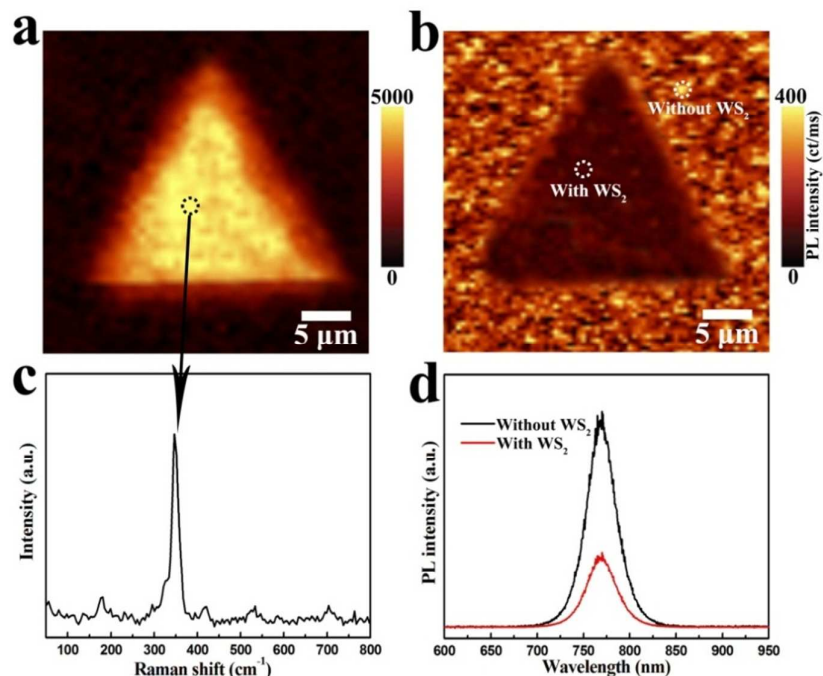

**Figure S3.** (a) Spatial distribution image of the Raman mapping of WS<sub>2</sub>/MAPbI<sub>3</sub> heterostructure. (b) Spatial distribution image of the PL mapping of WS<sub>2</sub>/MAPbI<sub>3</sub> heterostructure. (c) Raman spectra at the position as a circle marked in (a). (d) PL spectra at the position as the circles marked in (b).

The spatial distribution images of the Raman and PL intensity mapping of WS<sub>2</sub>/MAPbI<sub>3</sub> heterostructure are shown in Figure S3. The Raman intensity distribution of 349 cm<sup>-1</sup> peak from WS<sub>2</sub> layer in Figure S3a suggests the continuous distribution of WS<sub>2</sub> layer on perovskite surface without breaking. Additionally, the PL intensity mapping of perovskite exhibits relatively weak PL emission with a wavelength around 775 nm, when MAPbI<sub>3</sub>/WS<sub>2</sub> heterostructure was formed. The PL quenching of the MAPbI<sub>3</sub> can be attributed to the interfacial charge transfer, which is also in good consistence with the results in Figure 1f.

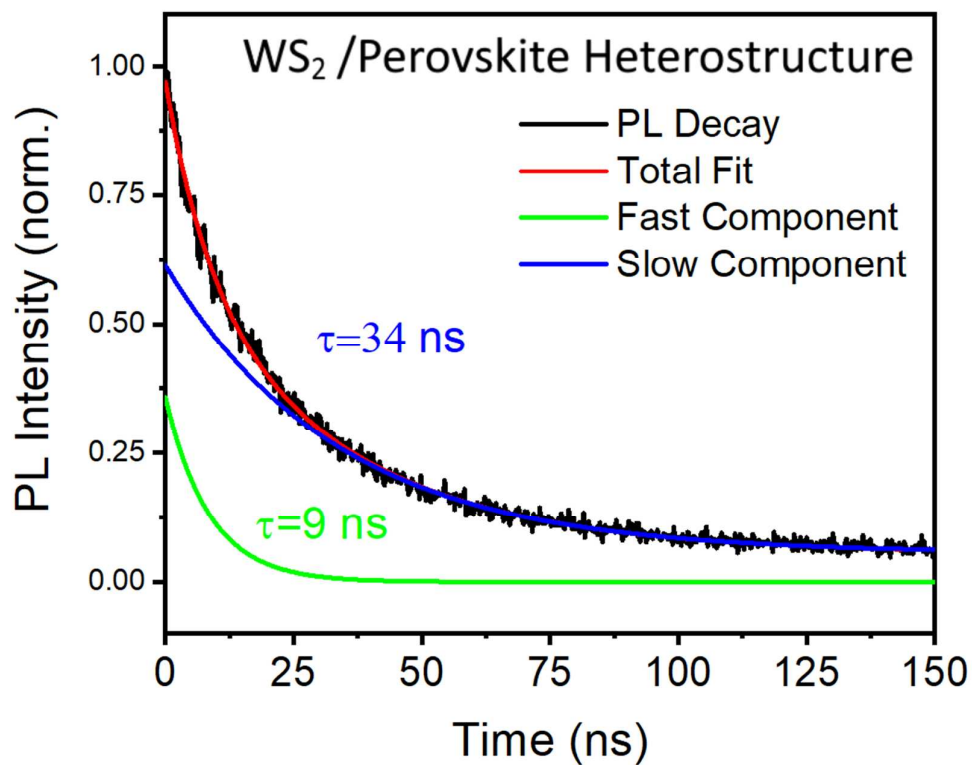

**Figure S4.** PL time decay trace on a WS<sub>2</sub>/MAPbI<sub>3</sub> bilayer with biexponential fits showing a fast ( $t \approx 9$  ns) and a slow transient ( $t \approx 34$  ns).

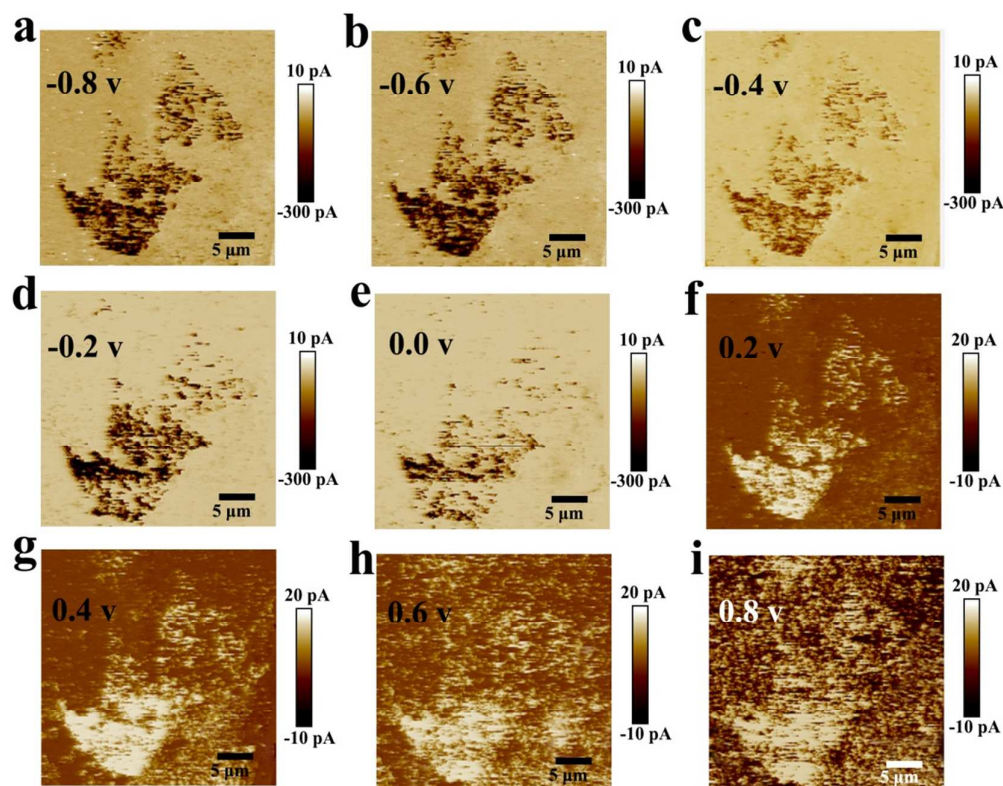

**Figure S5.** Current maps generated by conductive AFM measurements in dark with applied sample bias voltages of (a) -0.8 V, (b) -0.6 V, (c) -0.4 V, (d) -0.2 V, (e) 0.0 V, (f) 0.2 V, (g) 0.4 V, (h) 0.6 V, and (i) 0.8 V

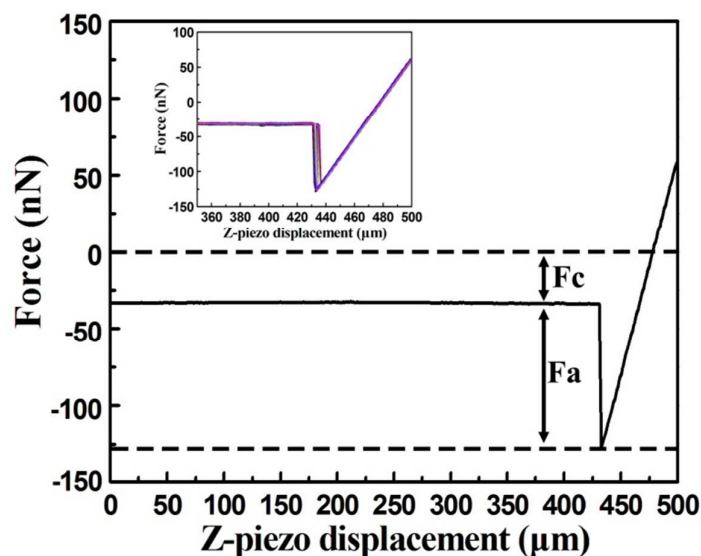

**Figure S6.** Representative force-displacement (F-D) curve in which  $F_c$  represents the instrumental deflection set-point force and  $F_a$  shows the additional force between the tip and the sample surface. Inset shows a series of F-D curves taken before and after each of the current images.



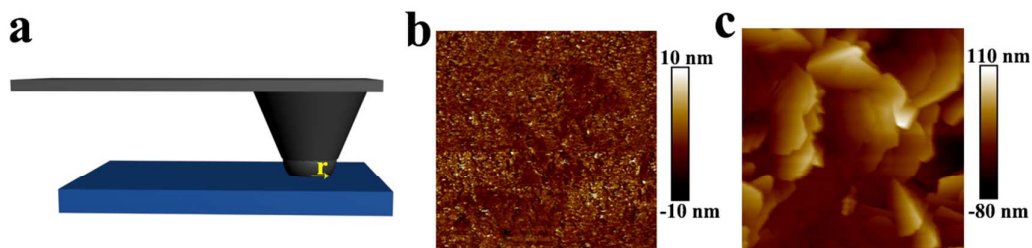

**Figure S7.** (a) Schematic illustration of the contact status between conductive tip and sample surface,  $r$  the contact area radius. (b) Deformation image of  $\text{WS}_2/\text{MAPbI}_3$  heterojunction. (c) AFM topographic image of RS-15M.

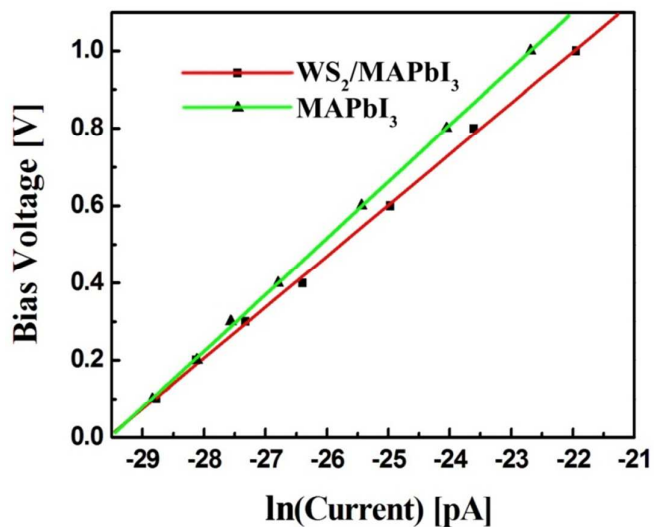

**Figure S8.** A semilogarithmic plot of bias voltage as a function of  $\ln(\text{current})$ . The red and green straight lines indicate linear fit to the data.

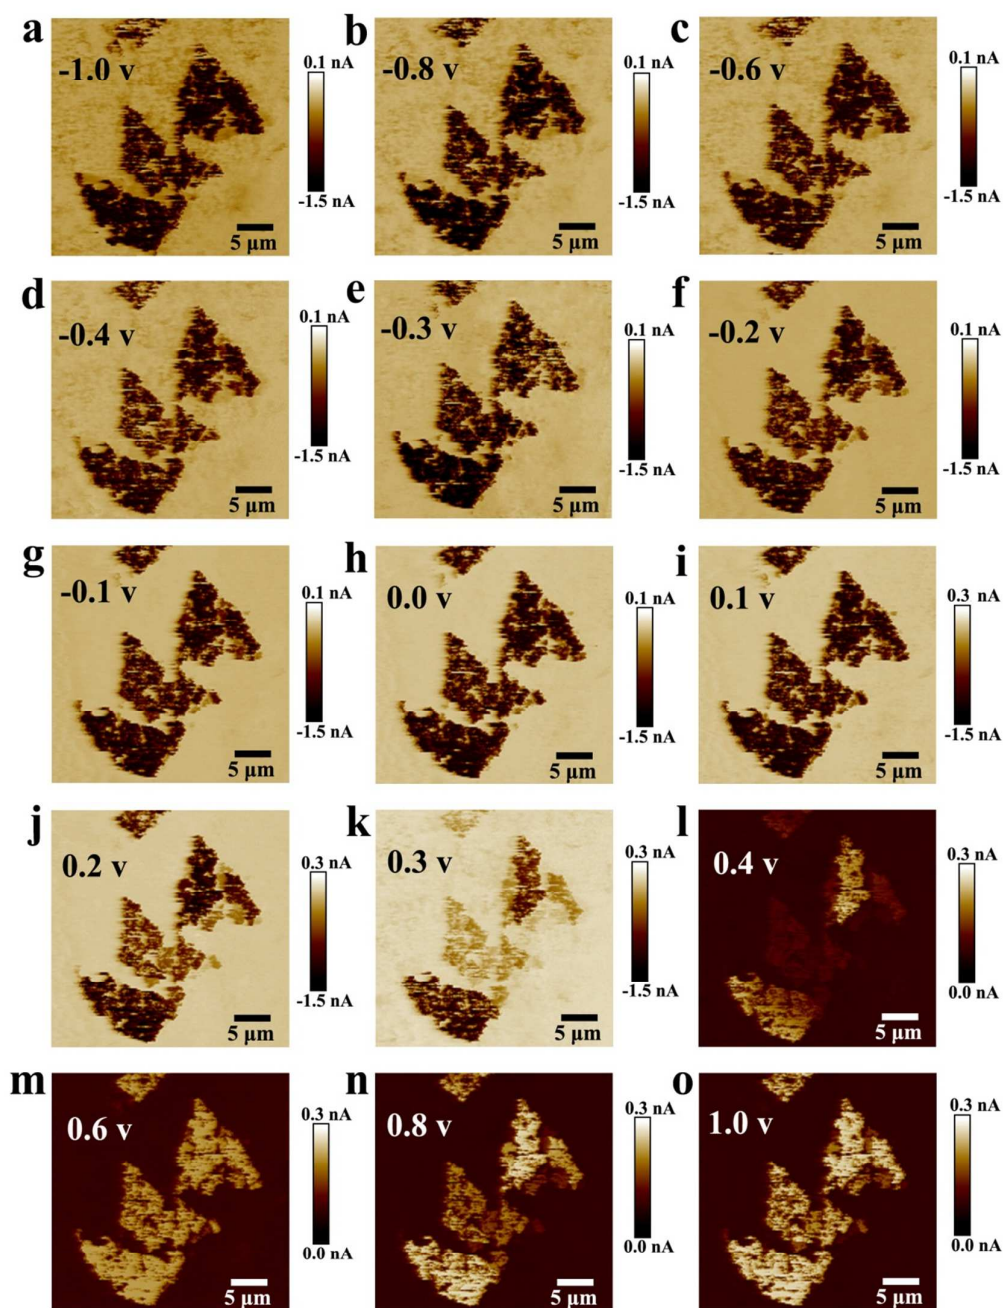

**Figure S9.** Current maps generated by PC-AFM measurements under laser illumination of  $\lambda=532$  nm with applied sample bias voltages of (a) -1.0V, (b) -0.8 V, (c) -0.6 V, (d) -0.4 V, (e) -0.3 V, (f) -0.2 V, (g) -0.1 V, (h) 0.0 V, (i) 0.1 V, (j) 0.2 V, (k) 0.3 V, (l) 0.4 V, (m) 0.6 V, (n) 0.8 V and (o) 1.0 V.



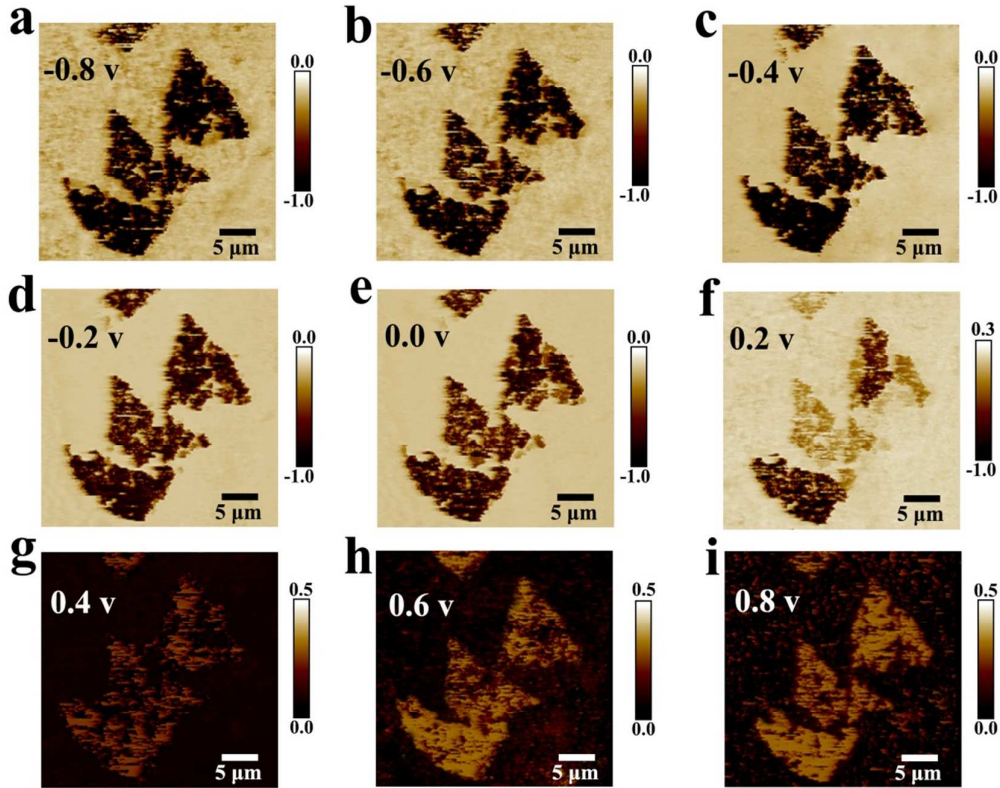

**Figure S10.** Photoreponse maps at applied sample bias voltages of (a) -0.8 V, (b) -0.6 V, (c) -0.4 V, (d) -0.2 V, (e) 0.0 V, (f) 0.2 V, (g) 0.4 V, (h) 0.6 V, and (i) 0.8 V under illumination of  $\lambda=532$  nm.

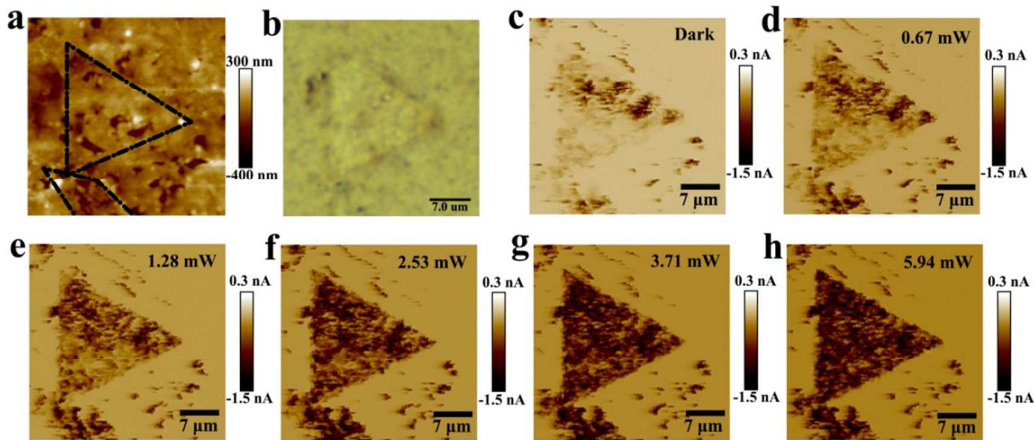

**Figure S11.** (a) AFM topographic image of the  $\text{WS}_2/\text{MAPbI}_3$  heterojunction. (b) Optical microscope image of the  $\text{WS}_2/\text{MAPbI}_3$  heterojunction. Photocurrent maps under varying incident laser power of (c) Dark (d) 0.67 mW, (e) 1.28 mW, (f) 2.53 mW, (g) 3.71 mW, (h) 5.94 mW under illumination of  $\lambda=532$  nm, which are used to generate the photoreponse maps presented in Figure 6a-e in the main text.

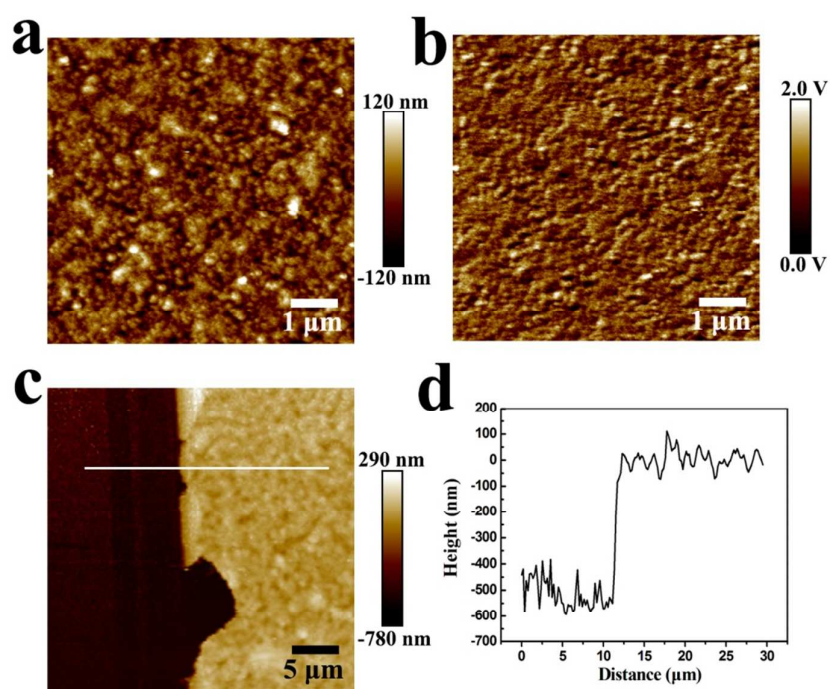

**Figure S12.** (a) AFM topographic image of perovskite film. (b) Surface potential image of the perovskite. (c) AFM topographic image of perovskite film, the darker region on the left is ITO substrate. (d) Height curve corresponding to the white line in panel c.

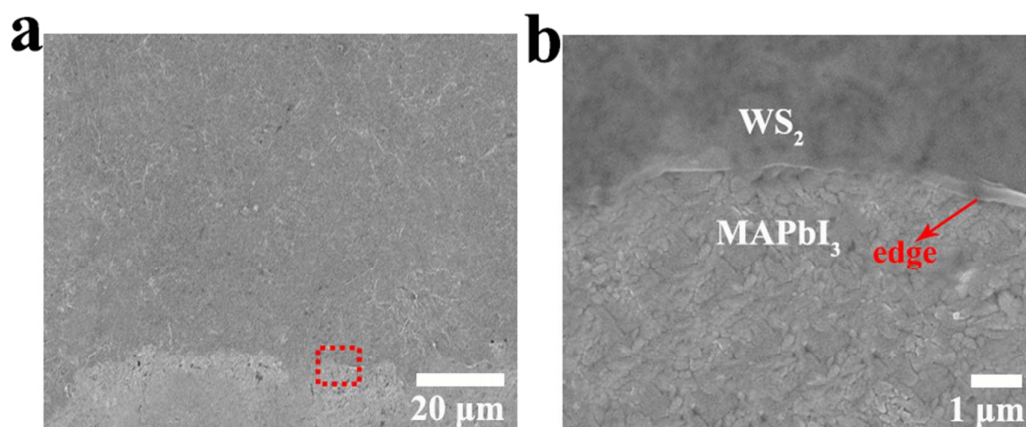

**Figure S13.** (a) SEM image of WS<sub>2</sub>/MAPbI<sub>3</sub> junction. (b) The zoom-in topographic image of the red frame region in (a).

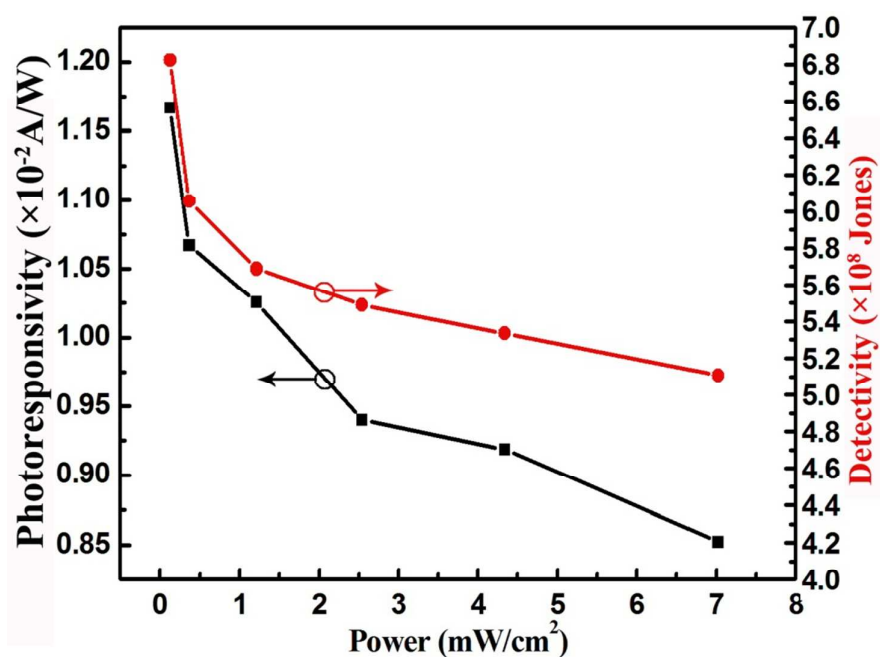

**Figure S14.** Photoresponsivity and detectivity of the MAPbI<sub>3</sub>-only photodetector under -2.5 V.

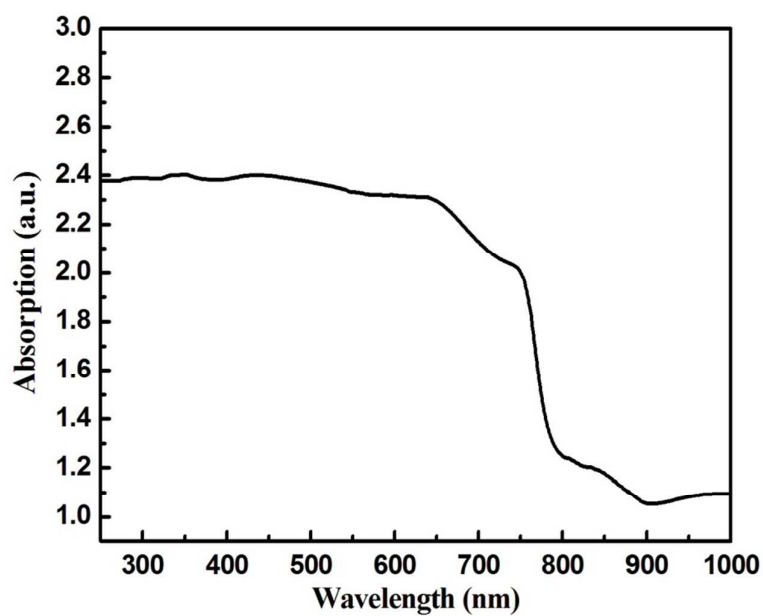

**Figure S15.** The absorption spectra of WS<sub>2</sub>/MAPbI<sub>3</sub> junction.

## REFERENCES

- (1) Ruskell, T. G.; Workman, R. K.; Chen, D.; Sarid, D.; Dahl, S.; Gilbert, S. High Resolution Fowler-Nordheim Field Emission Maps of Thin Silicon Oxide Layers. *Appl. Phys. Lett.* **1996**, *68*, 93.
- (2) Sze, S. M. *et al.* Physics of semiconductor devices. 3rd ed.; *Wiley-Interscience: Hoboken, NJ*, 2007.
- (3) Cappella, B.; Dietler, G. Force-Distance Curves by Atomic Force Microscopy. *Surf. Sci. Rep.* **1999**, *34*, 1-104.
- (4) Frammelsberger, W.; Benstetter, G.; Kiely, J.; Stamp, R. C-AFM-Based Thickness Determination of Thin and Ultra-Thin SiO<sub>2</sub> Films by Use of Different Conductive-Coated Probe Tips. *Appl. Surf. Sci.* **2007**, *253*, 3615-3626.
